# Supplementary material for: CaGA nanozymes with multienzyme activity realize multifunctional repair of acute wounds by alleviating oxidative stress and inhibiting cell apoptosis
Source: Royal Society of Chemistry journal article supplement (doi:10.1039/d4bm01155d), 2024-10-04
Supplement: d4bm01155d1.pdf [file d4bm01155d1.pdf]

## **CaGA nanozymes with multienzyme activity realize multifunctional repair of acute wounds by alleviating oxidative stress and inhibiting cell apoptosis**

Zenghong Chen<sup>1#</sup>, Xinyu Zhao<sup>2#</sup>, Liting Lin<sup>3#</sup>, Yuyu Cui<sup>1</sup>, Dongsheng Cao<sup>1\*</sup>, Xu-Lin Chen<sup>2\*</sup>, Xianwen Wang<sup>1,3\*</sup>

1. Department of Plastic and Reconstructive Surgery, The Second Affiliated Hospital of Anhui Medical University, Hefei 230601, P. R. China
2. Department of Burn, The First Affiliated Hospital of Anhui Medical University, Hefei 230032, P. R. China.
3. School of Biomedical Engineering, Research and Engineering Center of Biomedical Materials, Anhui Provincial Institute of Translational Medicine, Anhui Medical University, Hefei, 230032, P. R. China

### **\*Corresponding Authors:**

**E-mail:** [xianwenwang@ahmu.edu.cn](mailto:xianwenwang@ahmu.edu.cn) (X. Wang); [okcxl@126.com](mailto:okcxl@126.com) (X. Chen); [caodongsheng2017@163.com](mailto:caodongsheng2017@163.com) (D. Cao)

# These authors contributed equally to this work.

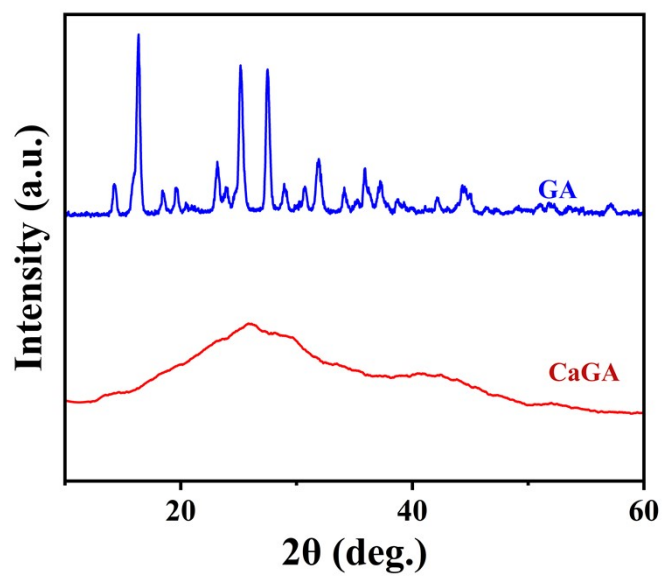

**Figure S1.** The XRD patterns of CaGA nanozymes.

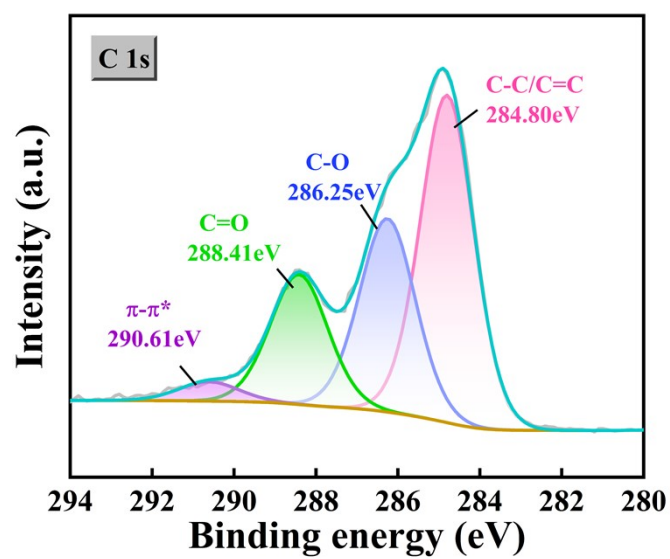

**Figure S2.** XPS spectrum of the C 1s orbital.

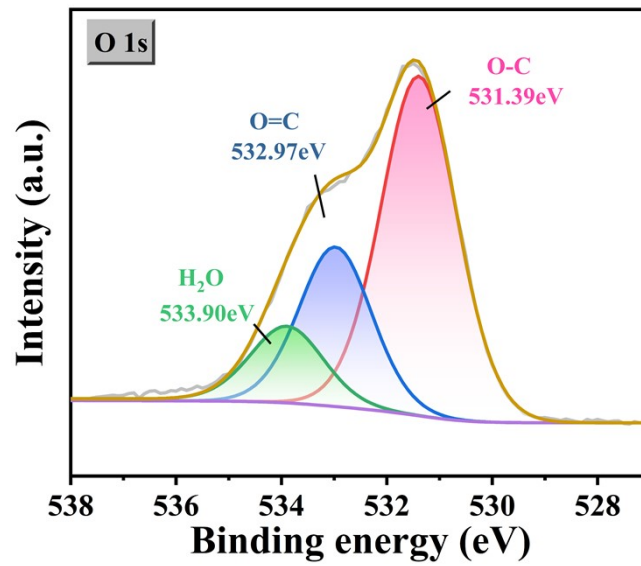

Figure S3. XPS spectrum of the O 1s orbital.

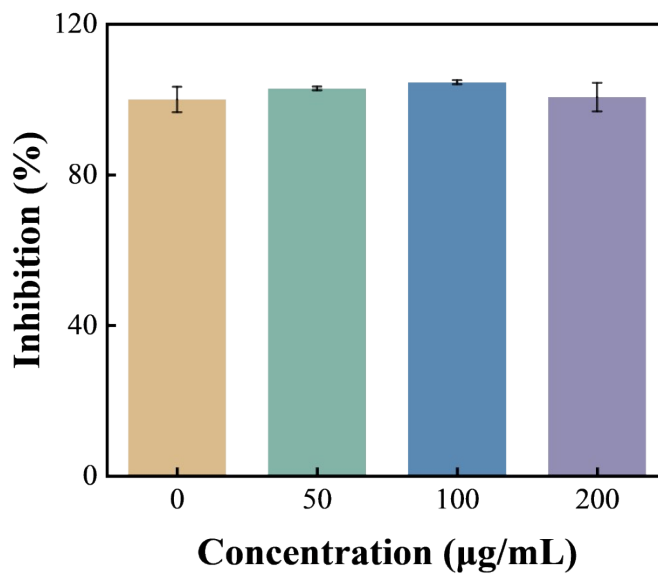

Figure S4. The cytotoxicity of CaGA nanozymes.

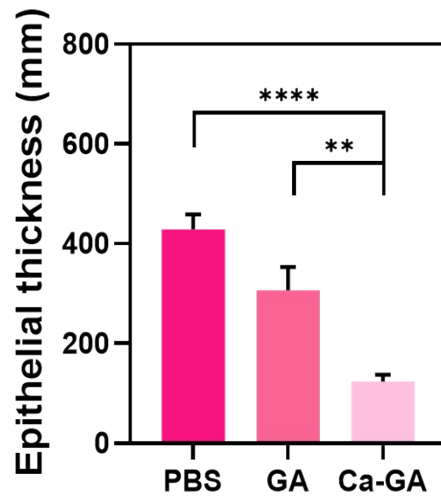

**Figure S5.** Quantitative statistics of epithelial thickness.

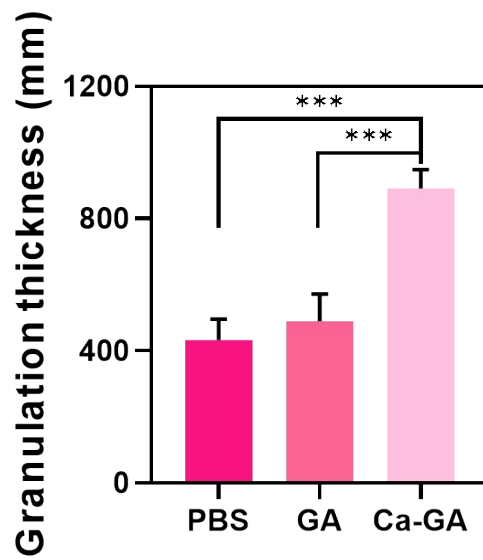

**Figure S6.** Quantitative statistics of granulation thickness.
